# Supplementary material for: Sparse Representation of Sounds in the Unanesthetized Auditory Cortex
Source: PubMed Central journal article supplement (PMC2214813; doi:10.1371/journal.pbio.0060016), 2008-01-29
Supplement: pbio.0060016.sg007.pdf [file pbio.0060016.sg007.pdf]

# Sparse Representation of Sounds in the Unanesthetized Auditory Cortex

Tomáš Hromádka, Michael R. DeWeese and Anthony M. Zador

## Figure S7

### **Neuronal responses are heterogeneous**

Figs. S4–S8 caption

Tone-evoked responses in the auditory cortex of unanesthetized rats are heterogeneous. The panels in Figs. S4–S8 show response dynamics of all neurons ( $n=100$ ) for which we assessed response significance to 50–60 dB tones. In each panel, dots represent individual spikes, and the gray shaded region indicates the tone duration (100 ms).

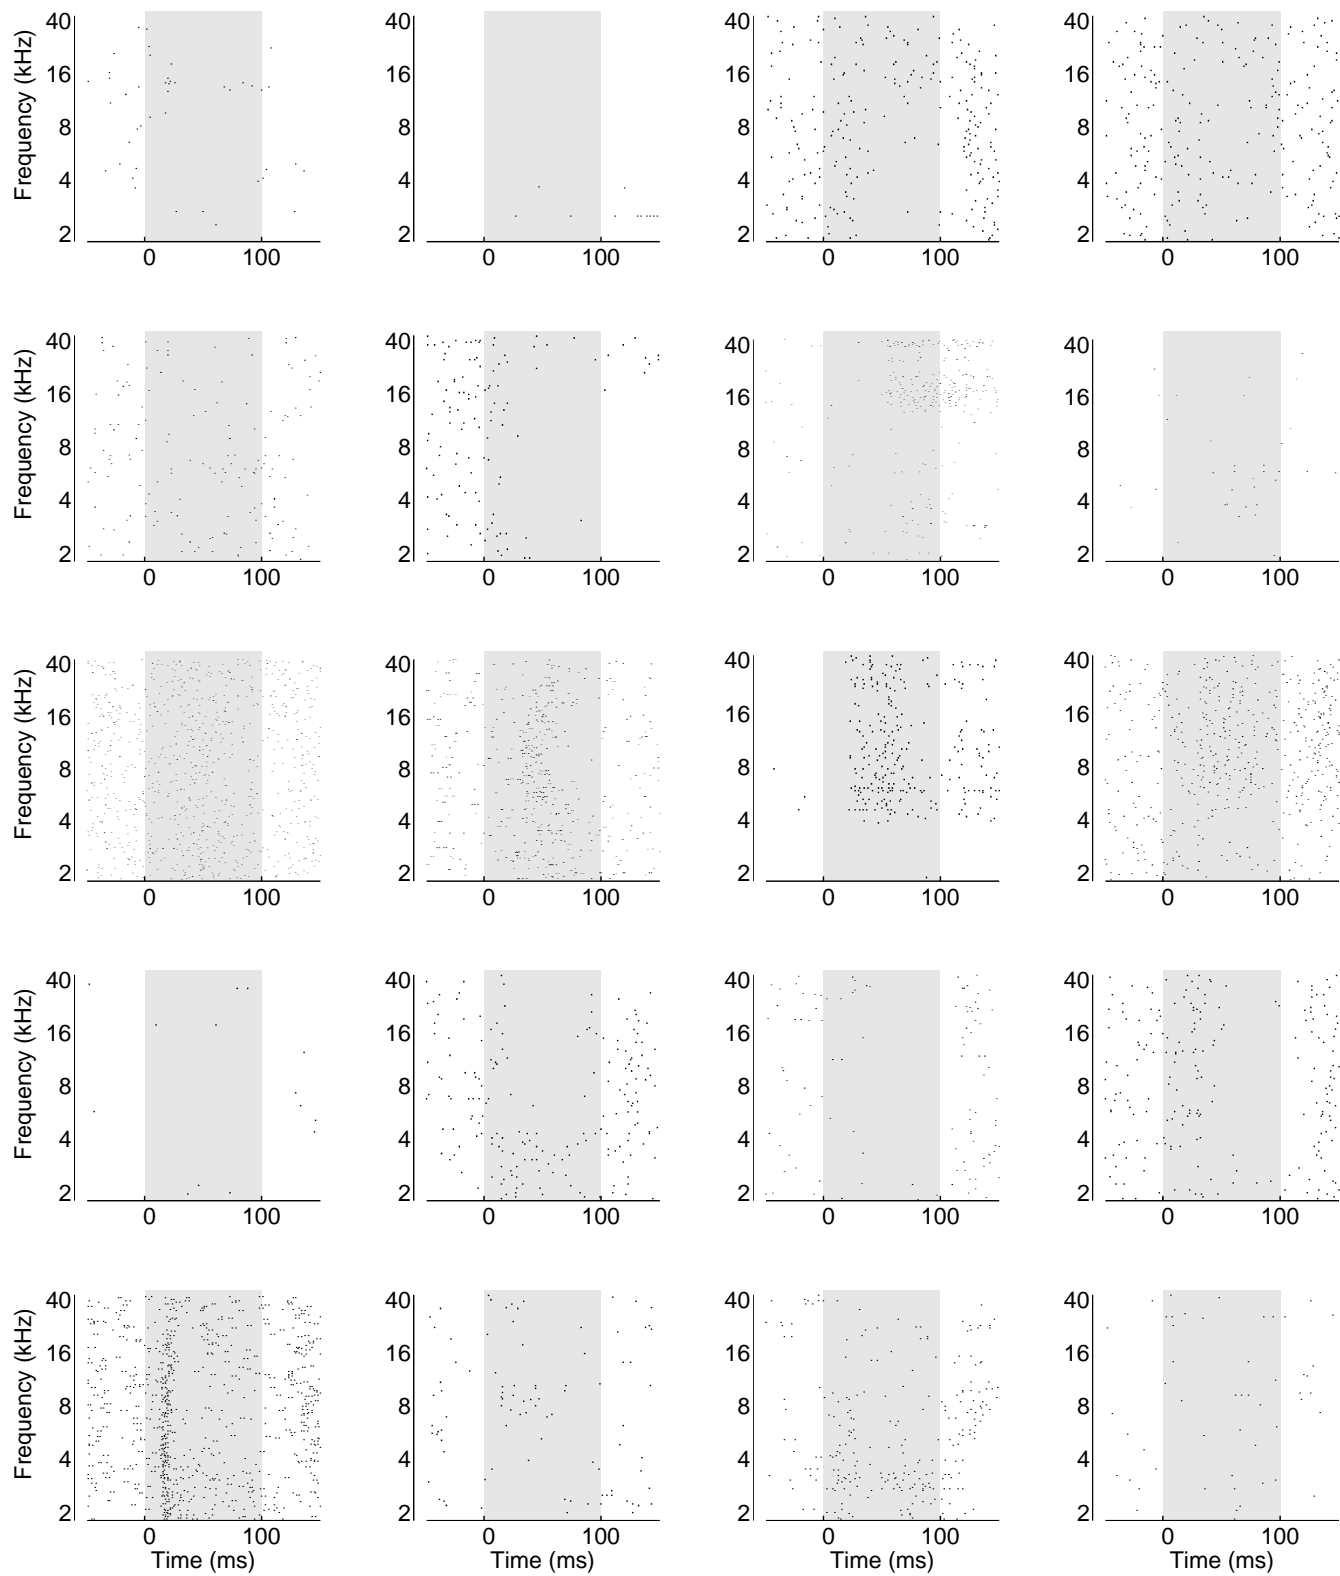

Figure S7:
